# Supplementary material for: Multiple Host Barriers Restrict Poliovirus Trafficking in Mice
Source: PubMed Central journal article supplement (PMC2390757; doi:10.1371/journal.ppat.1000082), 2008-06-06
Supplement: ppat.1000082.s001.pdf [file ppat.1000082.s001.pdf]

| Primer     | Sequence                       |
|------------|--------------------------------|
| CEBN2anti  | 5 ' TCAGTGTCAGGCTCTTGCGAG 3 '  |
| CEBN3anti  | 5 ' TCAGCGTTAGACTACTGCGAG 3 '  |
| CEBN4anti  | 5 ' TCAGTGTCGCTTTGCTGAGAG 3 '  |
| CEBN5anti  | 5 ' TCAGTGTTTCGGTTACTACGGG 3 ' |
| CEBN6anti  | 5 ' TTAGCGTACGCTTGCTCAGGG 3 '  |
| CEBN7anti  | 5 ' TCAGCGTACGGCTATTACGTG 3 '  |
| CEBN8anti  | 5 ' TTAGCGTCAGGTTGTTGAGAG 3 '  |
| CEBN9anti  | 5 ' TCTCGGTGCGTTTACTTCGTG 3 '  |
| CEBN10anti | 5 ' TCAGTGTCGAGATTATTGAGGG 3 ' |
| CEBN11anti | 5 ' TTTCTGTTTCGCTTGTTGCGAG 3 ' |

**Supplemental Figure S1. Oligonucleotide probe sequences for detection of individual virus pool members.**
