# Supplementary material for: Multiple Host Barriers Restrict Poliovirus Trafficking in Mice
Source: PubMed Central journal article supplement (PMC2390757; doi:10.1371/journal.ppat.1000082), 2008-06-06
Supplement: ppat.1000082.s002.pdf [file ppat.1000082.s002.pdf]

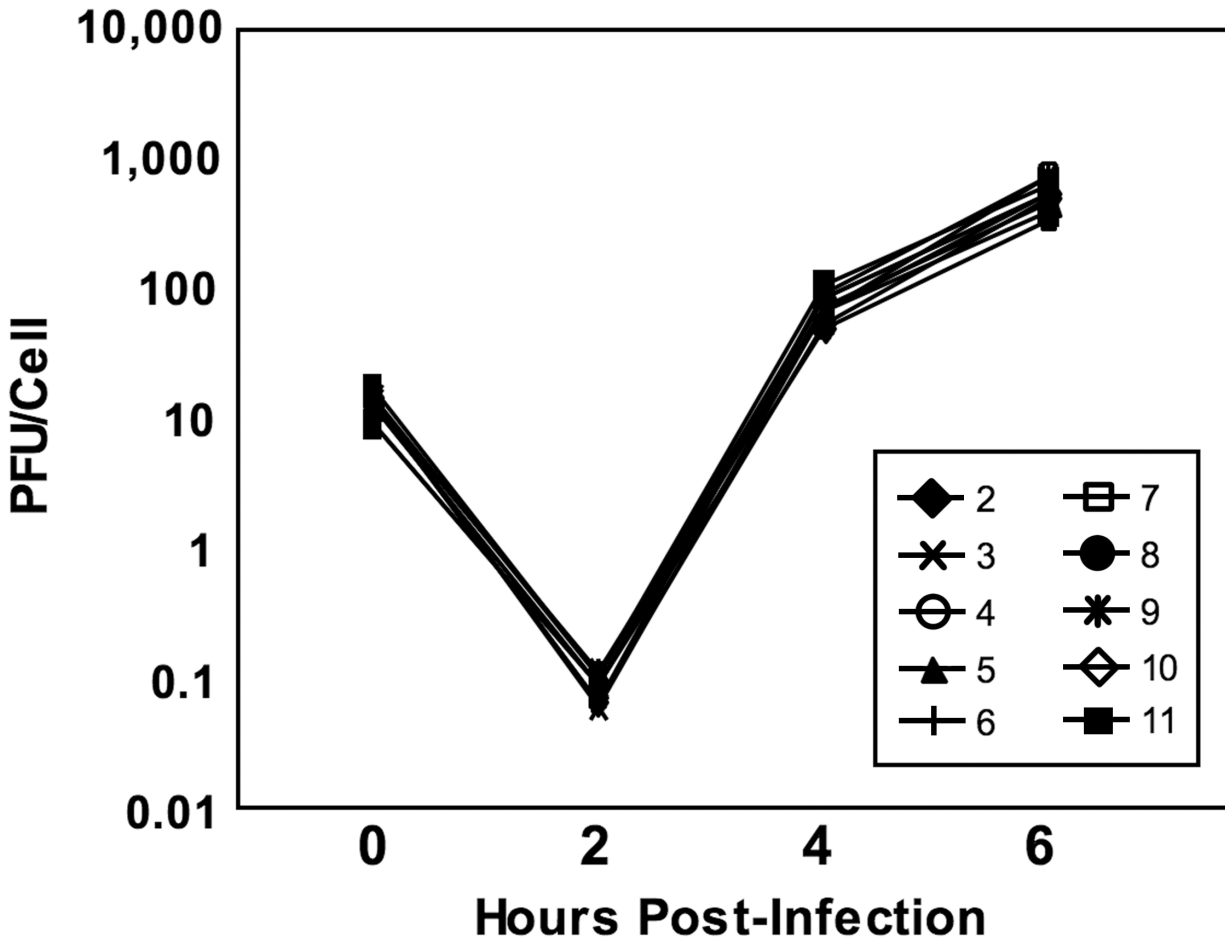

**Supplemental Figure S2. Single-cycle growth curves.** HeLa cells were infected using an MOI of 10 PFU/cell, and cell-associated virus was harvested at the indicated time-points and titered on fresh HeLa cells.
