# Supplementary material for: Multiple Host Barriers Restrict Poliovirus Trafficking in Mice
Source: PubMed Central journal article supplement (PMC2390757; doi:10.1371/journal.ppat.1000082), 2008-06-06
Supplement: ppat.1000082.s003.pdf [file ppat.1000082.s003.pdf]

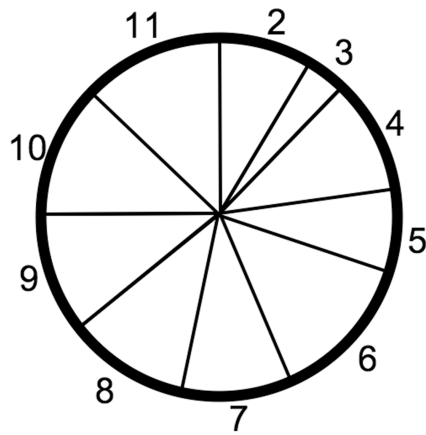

**Supplemental Figure S3. Distribution of pool members in mouse tissues.** Data derived from 479 hybridization dots representing over 25 mice were compiled into a pie graph. The numbers around the outside indicate the virus # (see Fig. 1).
